# Supplementary material for: Characterization of the fatty acid metabolism in colorectal cancer to guide clinical therapy
Source: PubMed Central journal article supplement — Mol Ther Oncolytics. 2021 Feb 18;20:532–44. doi: 10.1016/j.omto.2021.02.010 (PMC7941088; doi:10.1016/j.omto.2021.02.010), 2021-02-18
Supplement: mmc1.pdf [file mmc1.pdf]

OMTO, Volume ■ ■ ■

## **Supplemental information**

### **Characterization of the fatty acid metabolism in colorectal cancer to guide clinical therapy**

**Chengsheng Ding, Zezhi Shan, Mengcheng Li, Hongqi Chen, Xinxiang Li, and Zhiming Jin**

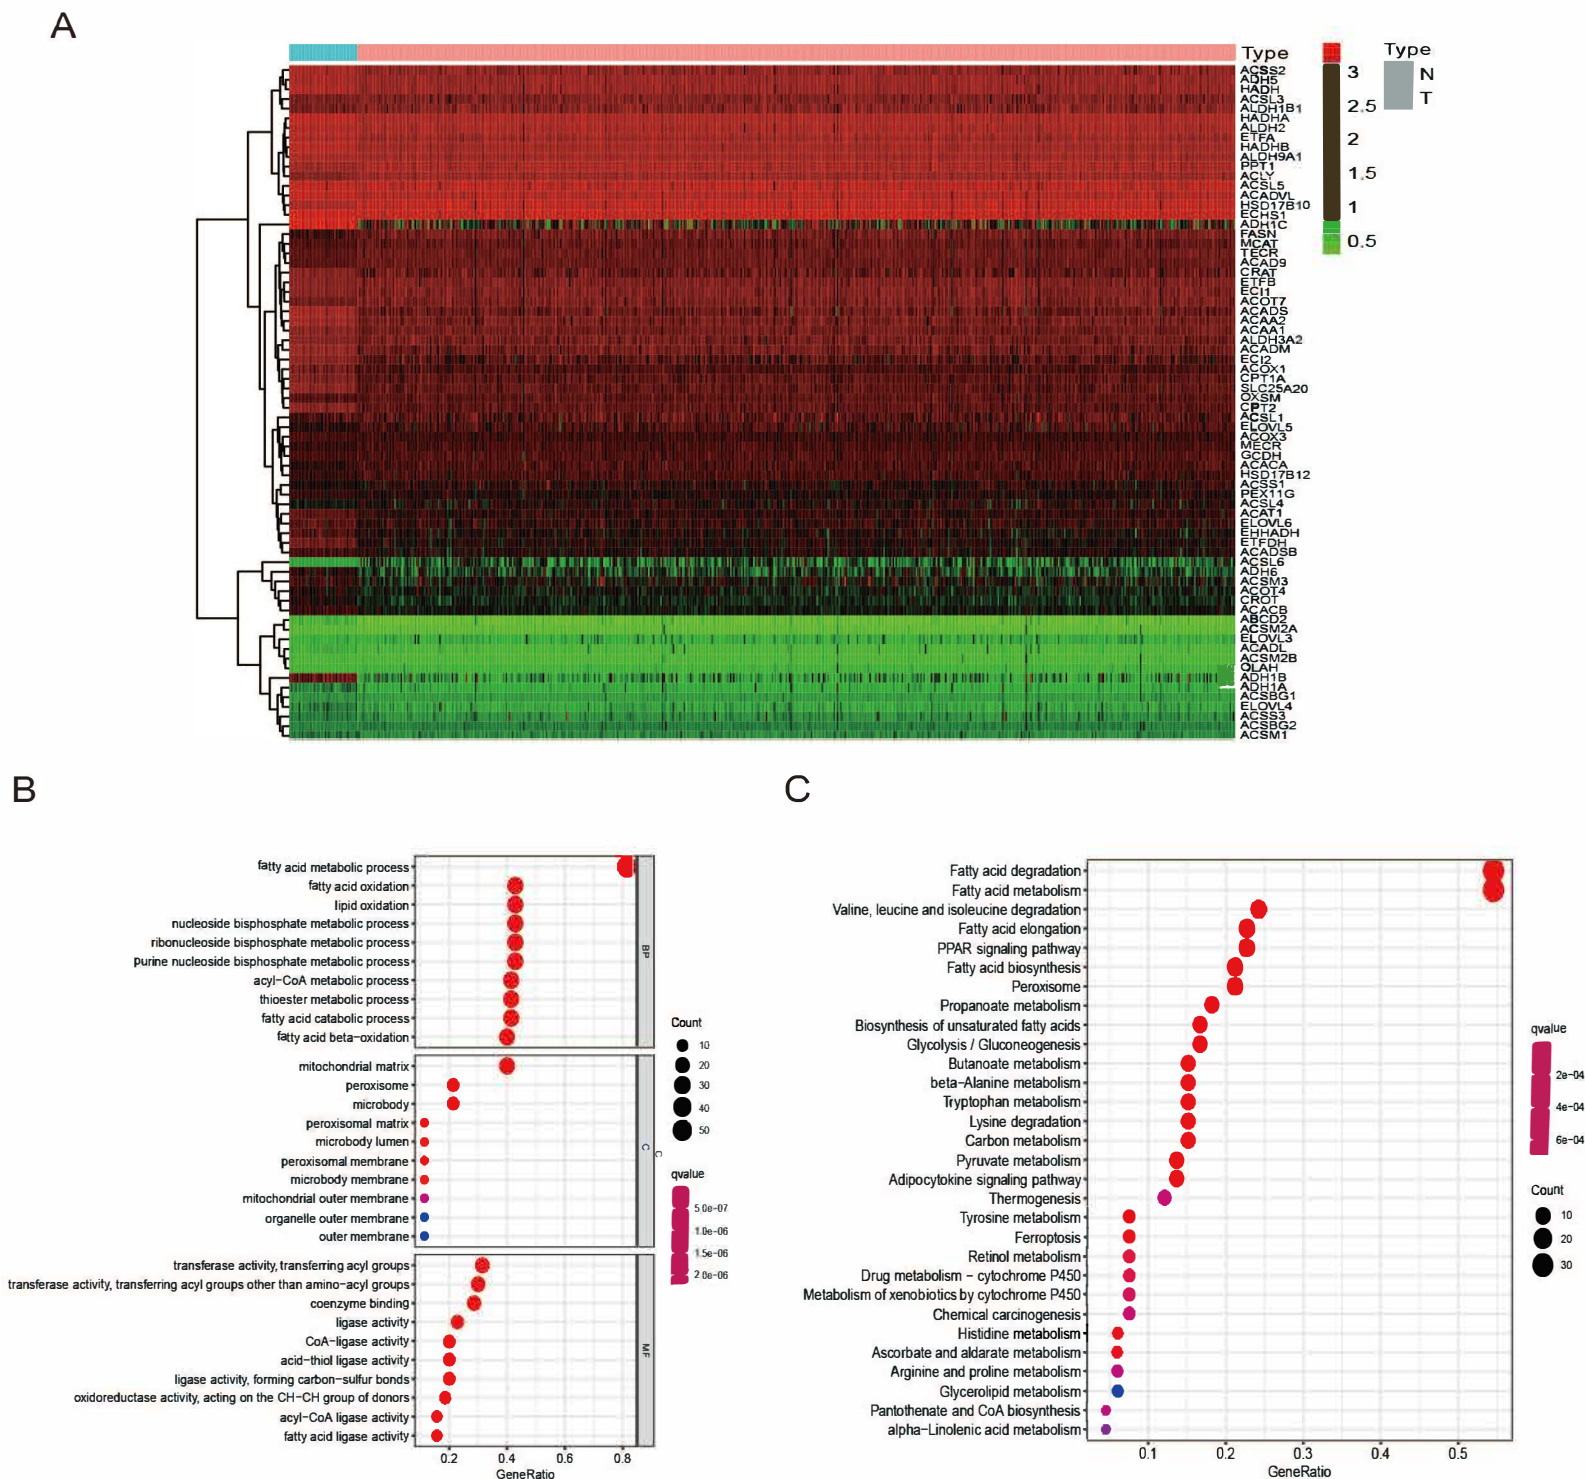

**Figure S1. Comparison between colorectal cancer tissue and normal tissue samples in the TCGA cohort.**

**A.** The heat map of 70 differentially expressed fatty acid metabolism-related genes. **B.** The result of GO enrichment analysis of differentially expressed fatty acid metabolism-related genes. **C.** The result of KEGG enrichment analysis of differentially expressed fatty acid metabolism-related genes.

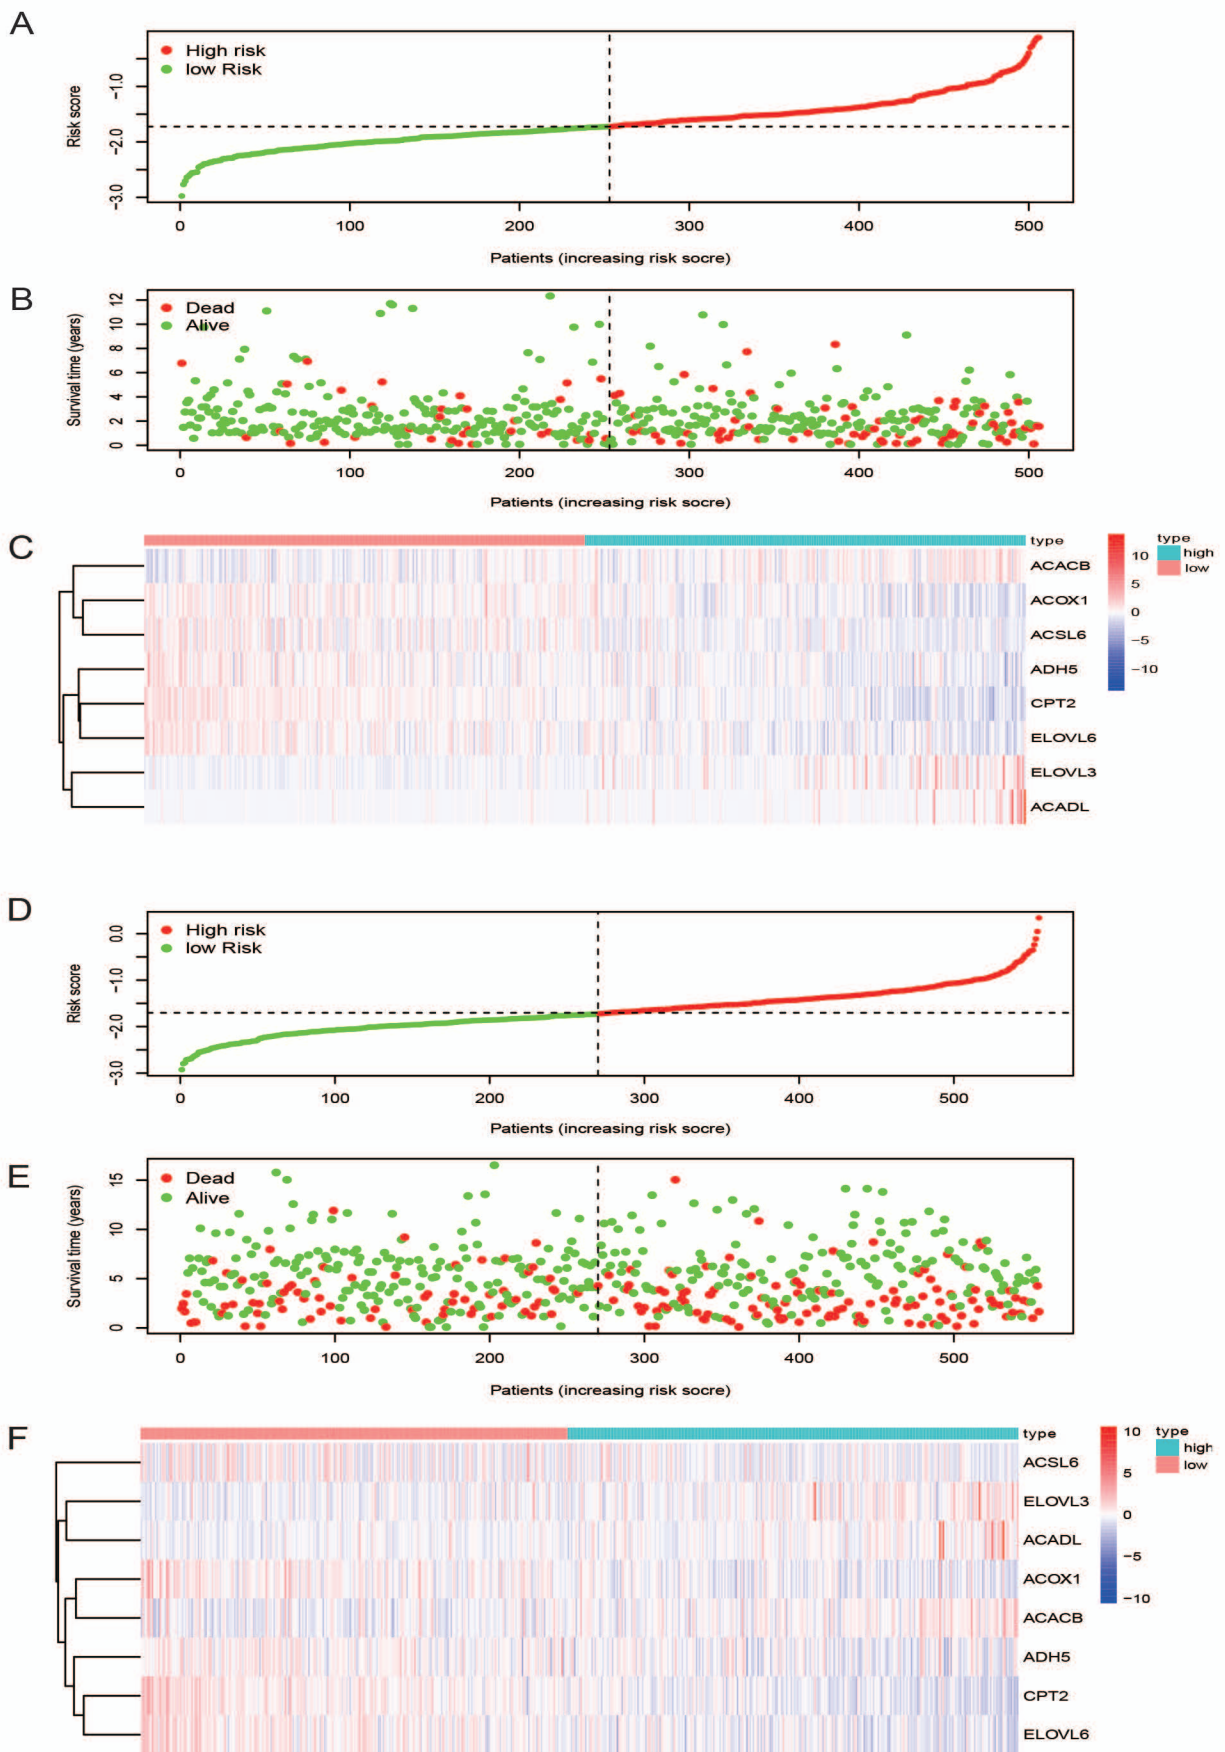

**Figure S2. The relationship between risk scores and survival status of samples in the training set and validation set.**

**A-C.** In the training set. **D-F.** In the validation set. **A and D.** Distribution of risk scores ranked from low to high. **B and E.** Comparison of survival status between low- and high- risk score groups. **C and F.** Heat map of 8 genes selected by LASSO Cox regression analysis.

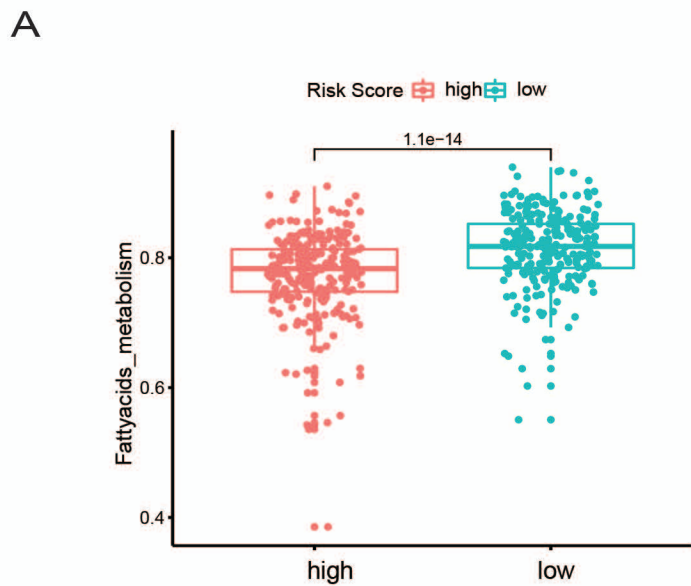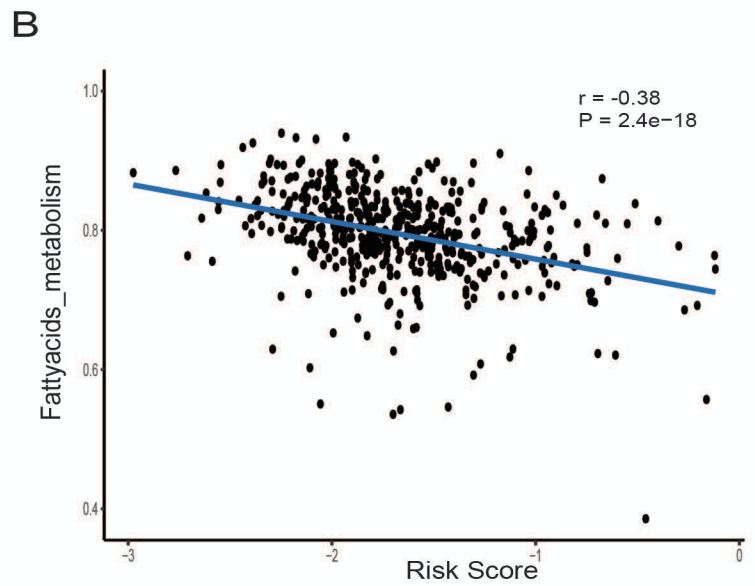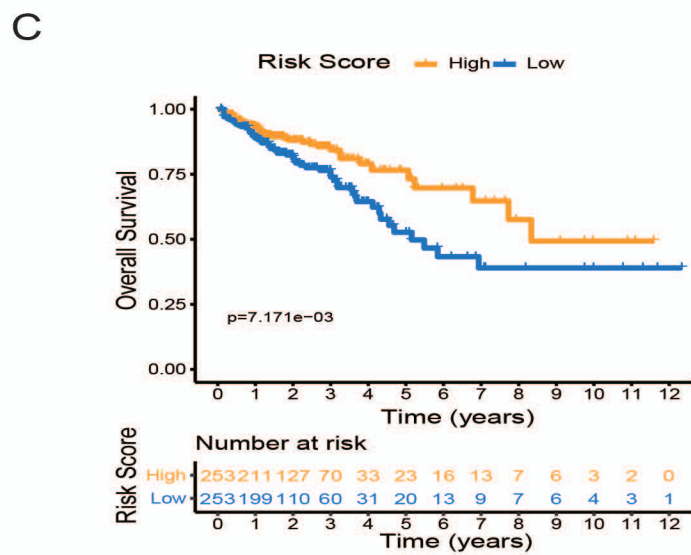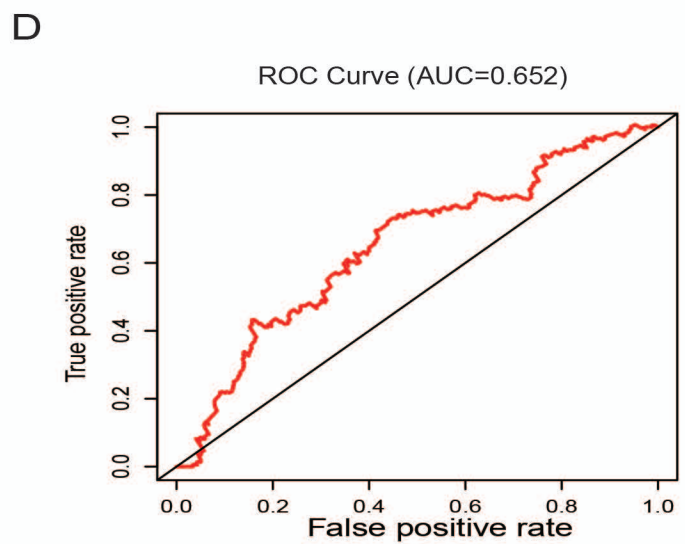

**Figure S3. Construction of fatty acid metabolism score model.**

**A.** The fatty acid metabolism score difference between high risk score and low risk score groups. **B.** The relationship between risk score model and fatty acid metabolism score. **C.** Survival analysis for subgroup patients stratified by fatty acid metabolism score. **D.** The predictive value of fatty acid metabolism score in CRC patients. AUC, 0.652.

A

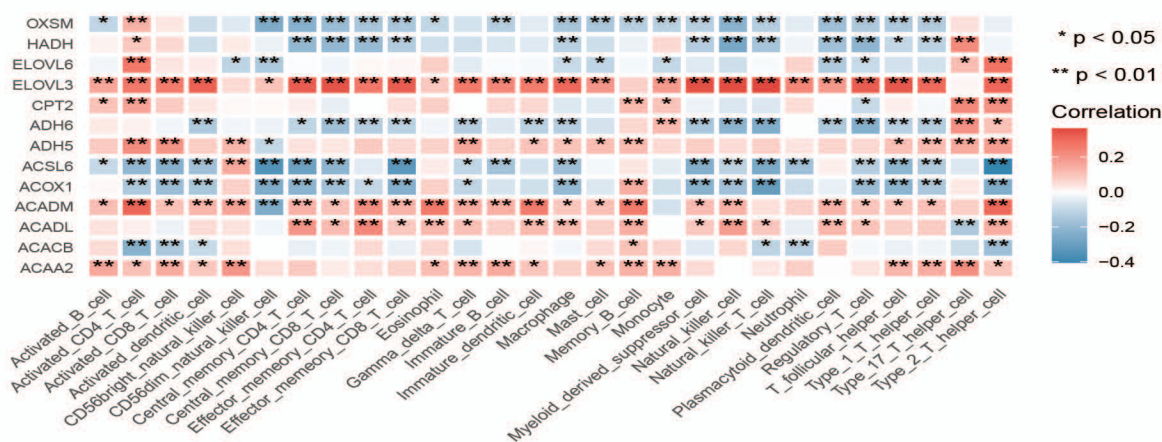

B

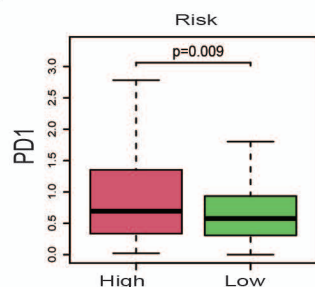

C

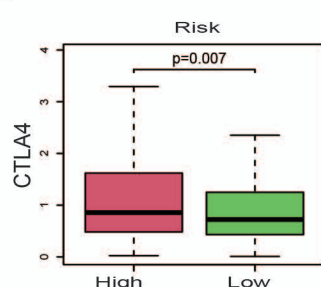

D

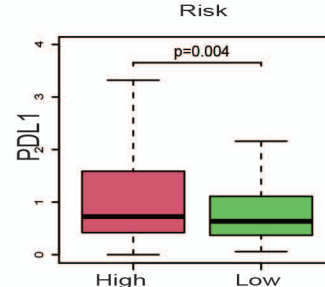

E

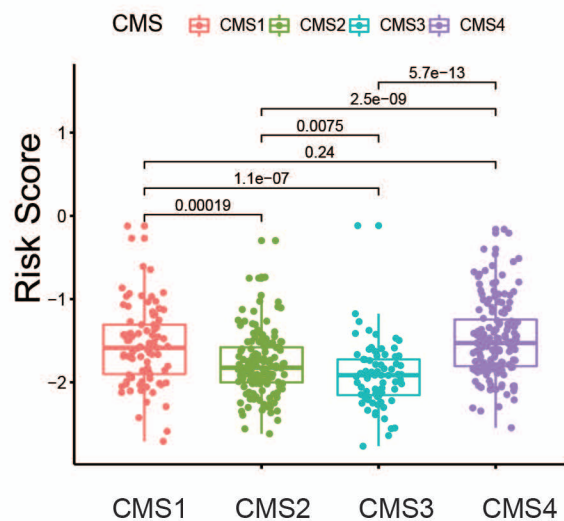

F

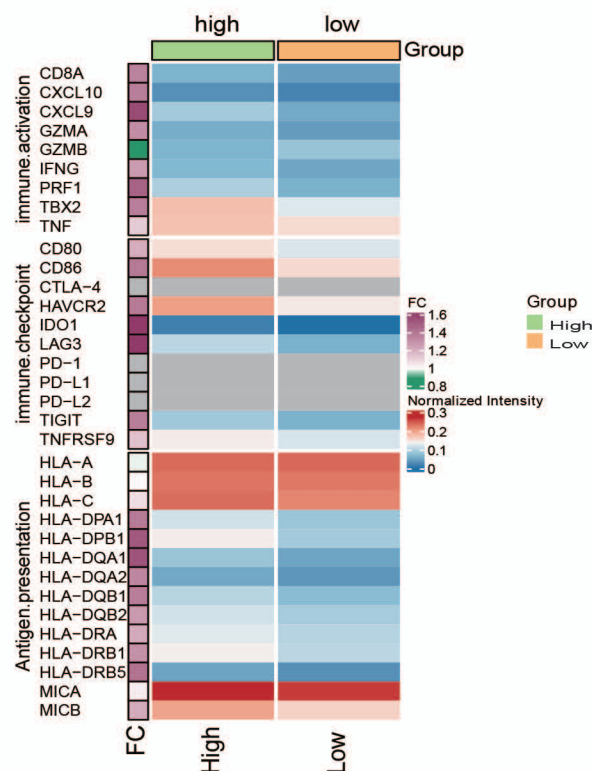

**Figure S4. Characteristics of immune-checkpoint related gene and known signatures in patients with high risk score and low risk score.**

**A.** Correlation between TME infiltration cells and fatty acid metabolism genes associated with prognosis. **B-D.** The immunity- checkpoint related gene expression difference in high score group and low score group. **E.** The risk score difference in CMS subtypes. **F.** Heat map showed known signatures genes expression in risk score model.

A

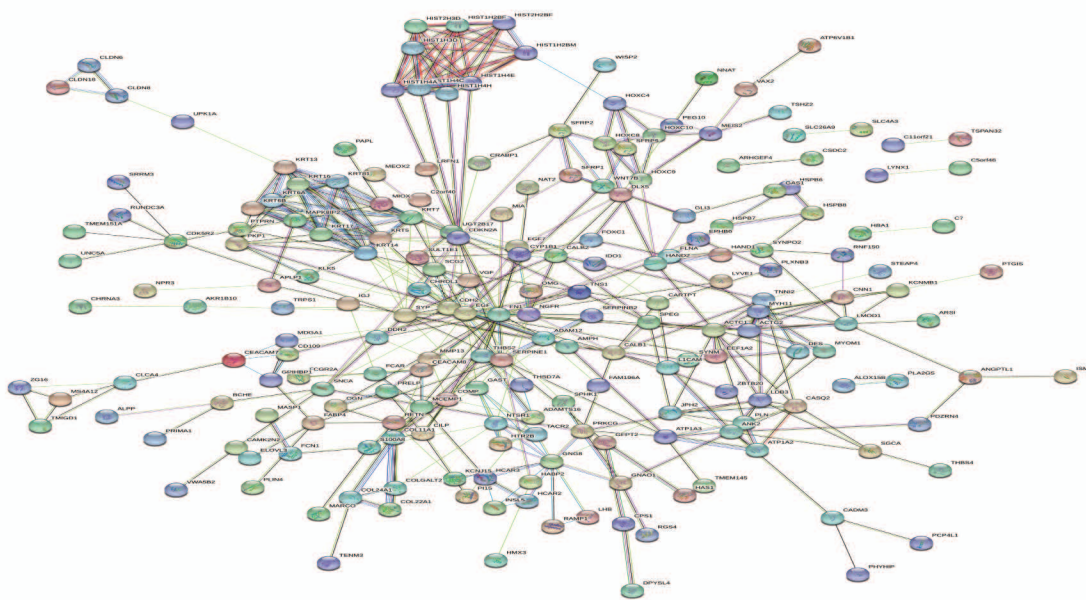

B

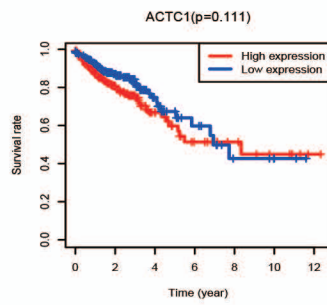

C

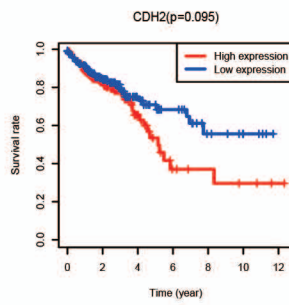

D

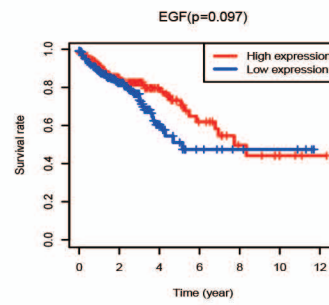

E

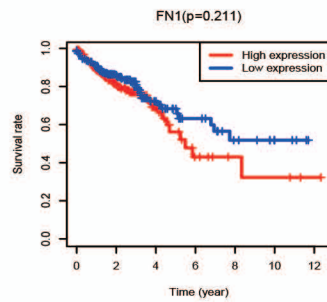

F

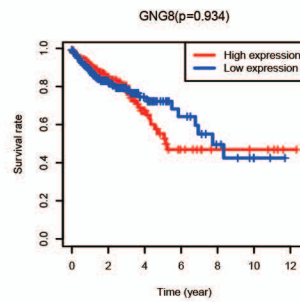

G

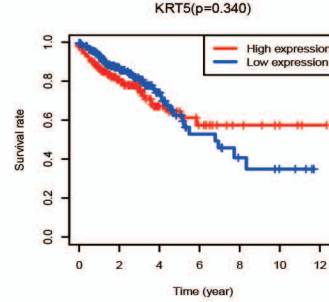

H

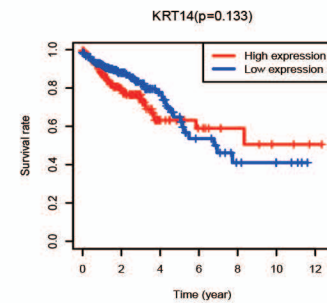

I

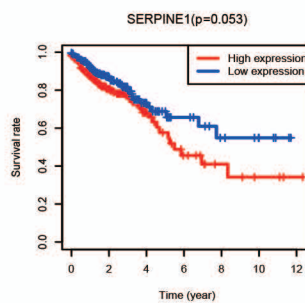

J

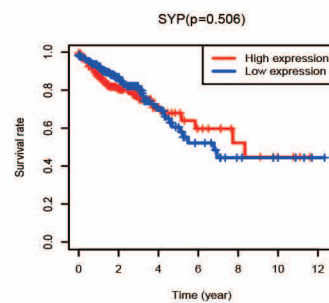

**Figure S5. Construction of Protein-protein interaction (PPI) network and prognostic value of top 10 hub genes.**

**A.** PPI network of DEGs between low- and high- risk score groups. **B-J.** Survival analysis for patients with high or low ACTC1 (B), CDH2 (C), EGF (D), FN1(D), GNG8 (E), KRT5 (F), KRT14 (G), CDKN2A (H), SERPINE1 (I) as well as SYP (J).
